# Supplementary material
Source: PubMed Central journal article supplement (PMC6281437)
Supplement: NIHMS1505576-supplement-3.pdf [file NIHMS1505576-supplement-3.pdf]

Table S1. Comparison of features among major sub-tomogram averaging software packages

|                                          | emClarity <sup>‡</sup> | pyTOM <sup>1</sup> | Jsub-Tomo <sup>2</sup> | Dynam <sup>3</sup> | Eman2 <sup>4</sup>          | RELION <sup>5</sup>  | PEET <sup>6</sup> | Protomo/i3 <sup>7</sup> |
|------------------------------------------|------------------------|--------------------|------------------------|--------------------|-----------------------------|----------------------|-------------------|-------------------------|
| GPU support                              | Yes                    | No                 | No                     | Yes                | No                          | No                   | No                | No                      |
| GUI                                      | No                     | No                 |                        | Yes                |                             | No                   | Yes               | No                      |
| Template Matching                        | Yes                    | Yes                | No                     | Manual             | Manual                      | No                   | Manual            | Yes                     |
| 3D-CTF correction                        | 3D-CTF WBP             | No/Yes             | No                     | No                 | Per-particle                | Per-particle         | No                | No                      |
| Missing-wedge Representation             | 3D-Sampling Function   | Binary Wedge       | Binary Wedge           | Binary Wedge       | Fourier Intensity threshold | 3D-Sampling Function | Binary Wedge      | Binary Wedge (Sharp)    |
| Tilt-series refinement using sub-volumes | Yes                    | No                 | No                     | No                 | No                          | No                   | No                | No                      |
| “Gold-standard”                          | Yes FOM weighting      | Yes FOM weighting  | No                     | Yes                | Yes Ad-Hoc weighting        | Yes FOM weighting    | Yes               | No                      |
| Classification                           | Yes                    | Yes                | No                     | Yes                | Yes                         | Yes                  | Yes               | Yes                     |

‡ This work

1. Hrabe, T. *et al.* PyTom : A python-based toolbox for localization of macromolecules in cryo-electron tomograms and subtomogram analysis. *J. Struct. Biol.* **178**, 177–188 (2012).
2. Maurer, U. E. *et al.* The structure of herpesvirus fusion glycoprotein B-bilayer complex reveals the protein-membrane and lateral protein-protein interaction. *Structure* **21**, 1396–1405 (2013).
3. Castaño-Díez, D., Kudryashev, M., Arheit, M. & Stahlberg, H. Dynamo: A flexible, user-friendly development tool for subtomogram averaging of cryo-EM data in high-performance computing environments. *J. Struct. Biol.* **178**, 139–151 (2012).
4. Galaz-Montoya, J. G., Flanagan, J., Schmid, M. F. & Ludtke, S. J. Single particle tomography in EMAN2. *J. Struct. Biol.* **190**, 279–290 (2015).
5. Bharat, T. A. M. & Scheres, S. H. W. Resolving macromolecular structures from electron cryo-tomography data using subtomogram averaging in RELION. *Nat. Protoc.* **11**, 2054–2065 (2016).
6. Heumann, J. M., Hoenger, A. & Mastronarde, D. N. Clustering and variance maps for cryo-electron tomography using wedge-masked differences. *J. Struct. Biol.* **175**, 288–299 (2011).
7. Winkler, H. 3D reconstruction and processing of volumetric data in cryo-electron tomography. *J. Struct. Biol.* **157**, 126–137 (2007).

Table S2. Run times for the yeast 80s tutorial data<sup>a</sup>

| Steps             | Time               | # of GPUs? |
|-------------------|--------------------|------------|
| Average           | 1h 31m             | 2          |
| Align             | 9h 45m             | 2          |
| Tomo-CPR          | 2h 10m             | 2          |
| 3D-CTF            | 1h 16m             | 2          |
| CTF update        | 0h 21m             | 2          |
| Template Matching | 0h 12m<br>(1h 24m) | 2          |
| Classification    | 0h 8m              | 2          |
| Total             | 15h 20m            |            |

Footnote: a. Run on a Samsung 850-pro solid state scratch disk, requiring ~ 520 Gb total space. 2 x 20x Intel Xeon CPU E5-2650 v2 @ 2.3 GHz (only 12 cores used), 512 Gb of memory available, ~ 32 Gb used. 2x Nvidia Titan V GPUs.

Table S3. Alignment details for the ribosome data. The yeast 80s (EMPIAR-10045) and mammalian 80s (EMPIAR-10064) differ only in the size of the mask, and particle mass as noted in the bottom row.

| Cycle             | Binning | Pixel | Angular Search       | Mask Type | Mask Radius (Å)   | Particle Radius (Å) | Mass (MDa)     |                |               |
|-------------------|---------|-------|----------------------|-----------|-------------------|---------------------|----------------|----------------|---------------|
| template matching | 5       | 10.85 | [ 180, 15, 180, 15 ] | sphere    | [ 180, 180, 180 ] | [ 160, 160, 160 ]   | 3.5            |                |               |
| 0                 | 4       | 8.68  | [ 0, 0, 16, 4 ]      | sphere    | [ 180, 180, 180 ] | [ 160, 160, 160 ]   | 3.5            |                |               |
| 1                 | 4       | 8.68  | [ 15, 5, 0, 0 ]      | sphere    | [ 180, 180, 180 ] | [ 160, 160, 160 ]   | 3.5            |                |               |
| 2                 | 4       | 8.68  | [ 0, 0, 18, 2 ]      | sphere    | [ 180, 180, 180 ] | [ 160, 160, 160 ]   | 3.5            |                |               |
| 3                 | 3       | 6.51  | [ 12, 4, 0, 0 ]      | sphere    | [ 180, 180, 180 ] | [ 160, 160, 160 ]   | 3.5            |                |               |
| 4                 | 3       | 6.51  | [ 0, 0, 9, 1.5 ]     | sphere    | [ 180, 180, 180 ] | [ 160, 160, 160 ]   | 3.5            |                |               |
| 5                 | 3       | 6.51  | [ 7.5, 2.5, 0, 0 ]   | sphere    | [ 180, 180, 180 ] | [ 160, 160, 160 ]   | 3.5            |                |               |
| 6                 | 2       | 4.34  | [ 7.5, 2.5, 0, 0 ]   | sphere    | [ 180, 180, 180 ] | [ 160, 160, 160 ]   | 3.5            |                |               |
| 7                 | 2       | 4.34  | [ 0, 0, 6, 1 ]       | sphere    | [ 180, 180, 180 ] | [ 160, 160, 160 ]   | 3.5            |                |               |
| 8                 | 2       | 4.34  | [ 4.5, 1.5, 0, 0 ]   | sphere    | [ 180, 180, 180 ] | [ 160, 160, 160 ]   | 3.5            |                |               |
| 9                 | 1       | 2.17  | [ 4.5, 1.5, 0, 0 ]   | sphere    | [ 180, 180, 180 ] | [ 160, 160, 160 ]   | 3.5            |                |               |
| 10                | 1       | 2.17  | [ 0, 0, 5, 0.5 ]     | sphere    | [ 180, 180, 180 ] | [ 160, 160, 160 ]   | 3.5            |                |               |
| 11                | 1       | 2.17  | [ 3.75, 1.25, 0, 0 ] | sphere    | [ 180, 180, 180 ] | [ 160, 160, 160 ]   | 3.5            |                |               |
| 12                | 1       | 2.17  | [ 1.5, 0.75, 0, 0 ]  | sphere    | [ 180, 180, 180 ] | [ 160, 160, 160 ]   | 3.5            |                |               |
| 13                | 1       | 2.17  | N/A                  | sphere    | [ 180, 180, 180 ] | [ 160, 160, 160 ]   | 3.5            |                |               |
|                   |         |       |                      |           |                   |                     | mammalian + 20 | mammalian + 20 | mammalian + 1 |

Table S4. Alignment details for the HIV-1 Gag data (EMPIAR-10164)

| Cycle             | Binning | Pixel | Angular Search          | Mask Type | Mask Radius (Å)    | Particle Radius (Å) | Mass (MDa) |
|-------------------|---------|-------|-------------------------|-----------|--------------------|---------------------|------------|
| template matching | 7       | 7     | [ 180, 9, 28, 7 ]       | cylinder  | [ 116, 116, 72 ]   | [ 66, 66, 56 ]      | 0.5        |
| 0                 | 6       | 6     | [ 0, 0, 24, 3 ]         | cylinder  | [ 116, 116, 72 ]   | [ 66, 66, 56 ]      | 0.5        |
| 1                 | 6       | 6     | [ 16, 4, 0, 0 ]         | cylinder  | [ 116, 116, 72 ]   | [ 66, 66, 56 ]      | 0.5        |
| 2                 | 6       | 6     | [ 0, 0, 9, 1.5 ]        | cylinder  | [ 116, 116, 72 ]   | [ 66, 66, 56 ]      | 0.5        |
| 3                 | 5       | 5     | [ 0, 0, 12, 1.5 ]       | cylinder  | [ 116, 116, 72 ]   | [ 66, 66, 56 ]      | 0.5        |
| 4                 | 5       | 5     | [ 15, 3, 0, 0 ]         | cylinder  | [ 116, 116, 72 ]   | [ 66, 66, 56 ]      | 0.5        |
| 5                 | 5       | 5     | [ 0, 0, 9, 1 ]          | cylinder  | [ 116, 116, 72 ]   | [ 66, 66, 56 ]      | 0.5        |
| 6                 | 4       | 4     | [ 0, 0, 9, 1 ]          | cylinder  | [ 116, 116, 72 ]   | [ 66, 66, 56 ]      | 0.5        |
| 7                 | 4       | 4     | [ 10, 2, 0, 0 ]         | cylinder  | [ 116, 116, 72 ]   | [ 66, 66, 56 ]      | 0.5        |
| 8                 | 4       | 4     | [ 0, 0, 7.5, 0.75 ]     | cylinder  | [ 116, 116, 72 ]   | [ 66, 66, 56 ]      | 0.5        |
| 9                 | 3       | 3     | [ 9, 1, 0, 0 ]          | cylinder  | [ 116, 116, 72 ]   | [ 66, 66, 56 ]      | 0.5        |
| 10                | 3       | 3     | [ 10, 2, 0, 0 ]         | cylinder  | [ 116, 116, 72 ]   | [ 66, 66, 56 ]      | 0.5        |
| 11                | 3       | 3     | [ 0, 0, 7.5, 0.75 ]     | cylinder  | [ 116, 116, 72 ]   | [ 66, 66, 56 ]      | 0.5        |
| 12                | 2       | 2     | [ 0, 0, 7.5, 0.75 ]     | cylinder  | [ 116, 116, 72 ]   | [ 66, 66, 56 ]      | 0.5        |
| 13                | 2       | 2     | [ 5, 1.25, 0, 0 ]       | cylinder  | [ 116, 116, 72 ]   | [ 66, 66, 56 ]      | 0.5        |
| 14                | 2       | 2     | [ 1.5, 0.75, 0.5, 0.5 ] | cylinder  | [ 116, 116, 72 ]   | [ 66, 66, 56 ]      | 0.5        |
| 15                | 2       | 2     | [ 0, 0, 6, 0.5 ]        | cylinder  | [ 116, 116, 72 ]   | [ 66, 66, 56 ]      | 0.5        |
| 16                | 1       | 1     | [ 0, 0, 3, 0.3 ]        | cylinder  | [ 90, 90, 72, 72 ] | [ 66, 66, 56 ]      | 0.5        |
| 17                | 1       | 1     | [ 4.5, 0.75, 0, 0 ]     | cylinder  | [ 90, 90, 72, 72 ] | [ 66, 66, 56 ]      | 0.5        |
| 18                | 1       | 1     | [ 1.2, 0.4, 0, 0 ]      | cylinder  | [ 90, 90, 72, 72 ] | [ 66, 66, 56 ]      | 0.5        |
